# Supplementary material
Source: PubMed Central journal article supplement (PMC3136192)

# European Journal of Immunology

**Supporting Information**

**for**

**DOI 10.1002/eji.200939619**

**Low cross-reactivity of T-cell responses against lipids from *Mycobacterium bovis* and *M. avium paratuberculosis* during natural infection**

Ildiko Van Rhijn, Thi Kim Anh Nguyen, Anita Michel, Dave Cooper, Marc Govaerts, Tan-Yun Cheng, Willem van Eden, D. Branch Moody, Jacobus A. W. Coetzer, Victor Rutten and Ad P. Koets

A

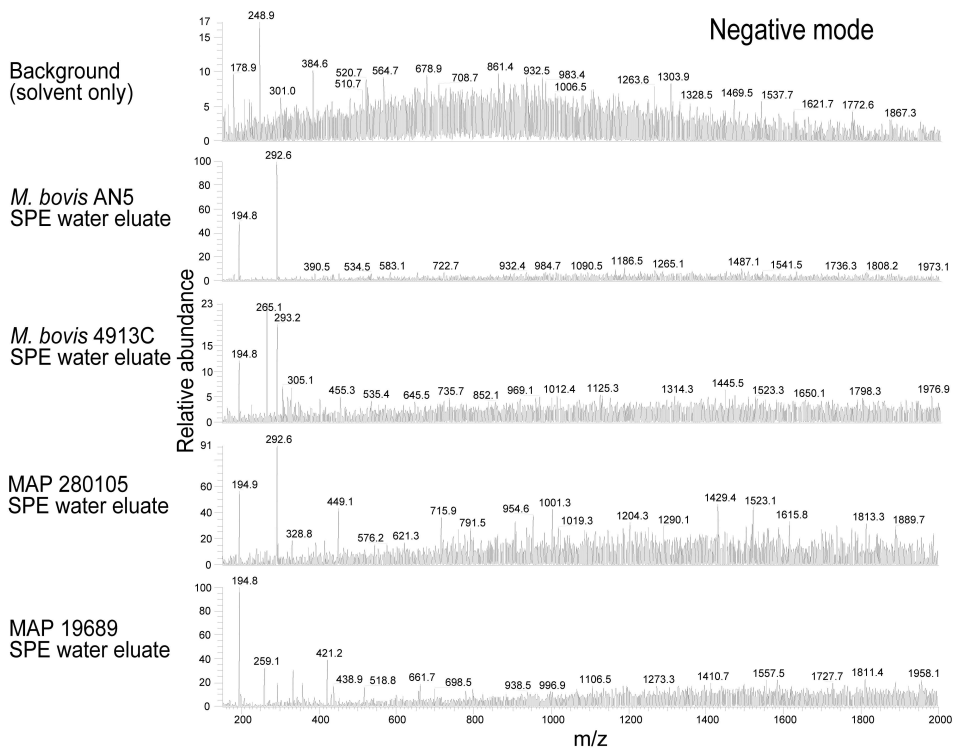

B

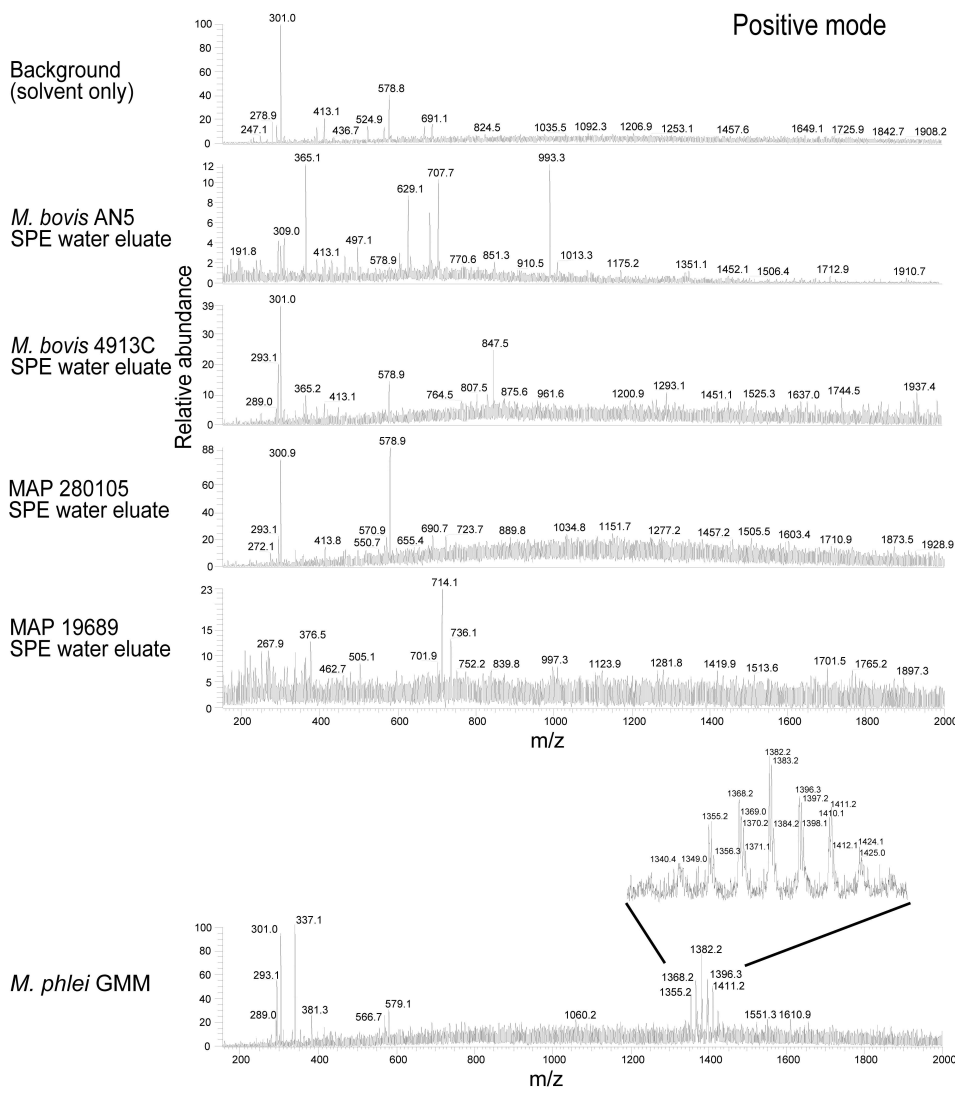

Supplement: NIHMS178313-supplement-supplemental.pdf [file NIHMS178313-supplement-supplemental.pdf]
